# Supplementary material for: Micelles prepared from poly(N-isopropylacrylamide-co-tetraphenylethene acrylate)-b-poly[oligo(ethylene glycol) methacrylate] double hydrophilic block copolymer as hydrophilic drug carrier
Source: Royal Society of Chemistry journal article supplement (doi:10.1039/c8tb02247j), 2018-01-01
Supplement: c8tb02247j1.pdf [file c8tb02247j1.pdf]

## Support Information

### **Micelles prepared from poly(N-isopropylacrylamide-co-tetraphenylethene acrylate)-*b*-poly [oligo(ethylene glycol) methacrylate] double hydrophilic block copolymer as hydrophilic drug carrier**

YangYang Xu ‡, Gaocan Li ‡, Weihua Zhuang , HongChi Yu, Yanfei Hu\* and Yunbing Wang \*

National Engineering Research Center for Biomaterials, Sichuan University, Chengdu,  
610065, P.R. China

\* Correspondence to: Y. F. Hu, E-mail address: [huyanfei@scu.edu.cn](mailto:huyanfei@scu.edu.cn) and Y. B. Li, E-mail  
address: [yunbing.wang@scu.edu.cn](mailto:yunbing.wang@scu.edu.cn)

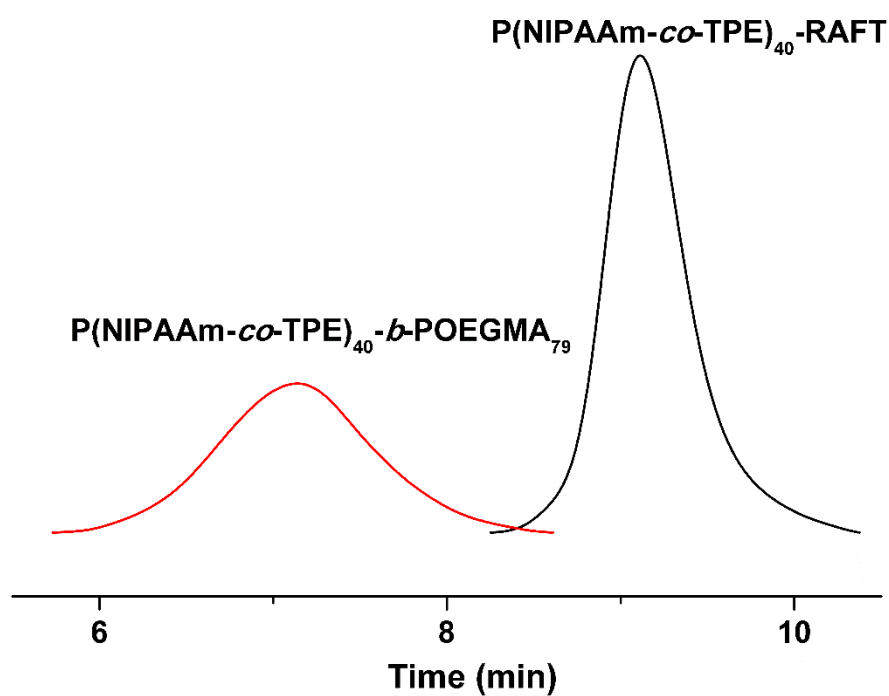

Figure S1 GPC spectra of  $(PNIPAAm-co-TPE)-RAFT$  and  $P(NIPAAm-co-TPE)-b-POEGMA$

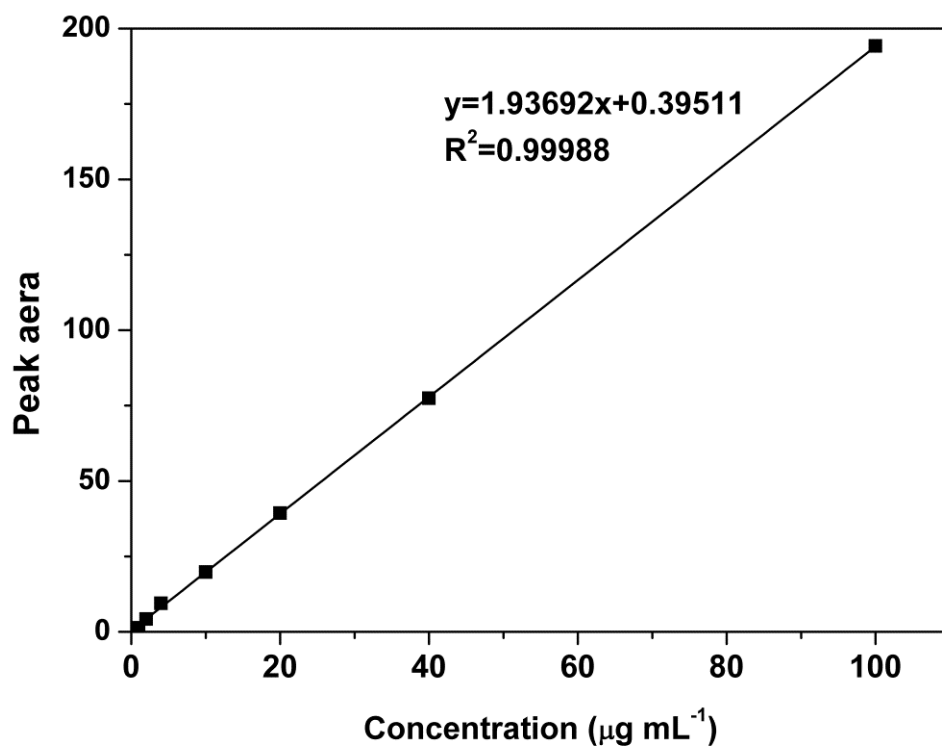

Figure S2 Calibration curve of TP5 determined by HPLC

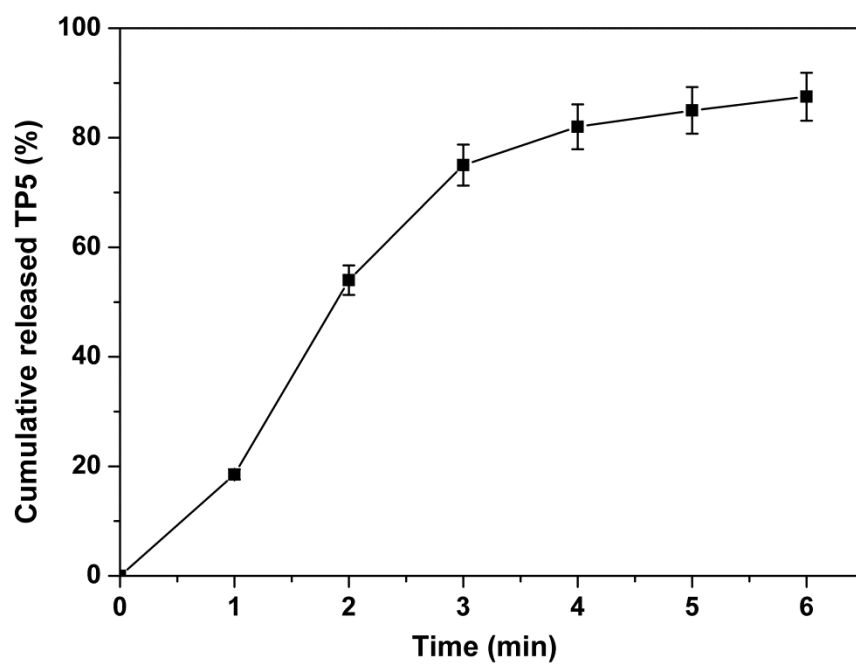

Figure S3 TP5 release from dialysis bag (The error bar is mean deviation, n=3).
